# Supplementary material
Source: PubMed Central journal article supplement (PMC3063592)
Supplement: 1000081107_pnas.201000081SI.pdf [file 1000081107_pnas.201000081SI.pdf]

# Supporting Information

Koenig et al. 10.1073/pnas.1000081107

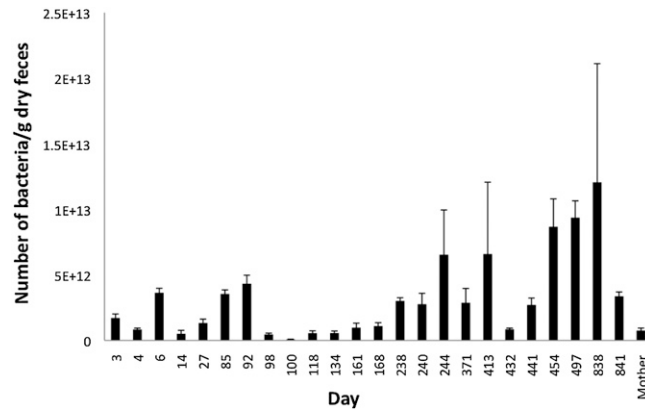

Fig. S1. Bacterial load in fecal samples determined by quantitative PCR. Means of five replicates per sample are plotted. Error bars are SDs.





**Table S1. Distribution of 16S rRNA genes amplified from samples associated with the infant time series**

[Table S1 \(DOC\)](#)

**Table S2. Metagenomic sequencing statistics**

[Table S2 \(DOC\)](#)

**Table S3. Pairwise analysis summarizing the posterior probability of being assigned to one of four defined steps within the infant gut microbial succession**

[Table S3 \(DOC\)](#)

**Table S4. Microbial subsystem genes that are overrepresented in whole-community DNA extracted from the infant meconium sample ( $P < 0.05$ )**

[Table S4](#)

**Table S5. Key for metagenomic functions illustrated in Fig. 6 (main text)**

[Table S5 \(DOC\)](#)

**Table S6. Summary of the regularized canonical correlation analysis for metagenomic function and bacterial phyla**

[Table S6 \(DOC\)](#)
